# Supplementary material
Source: PubMed Central journal article supplement (PMC2268153)

**A**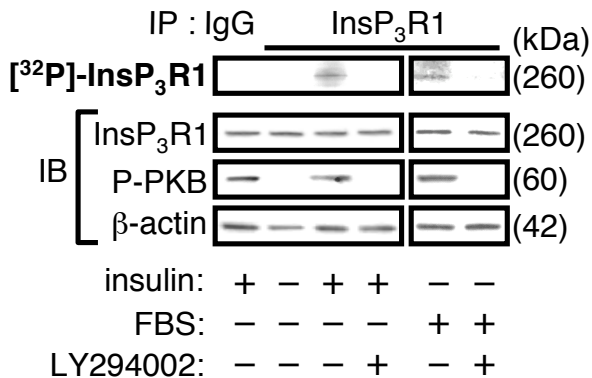**B**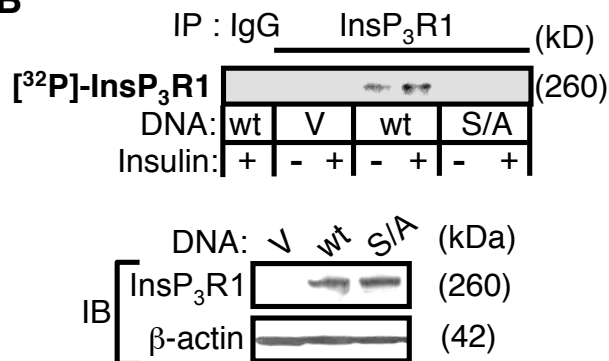**C**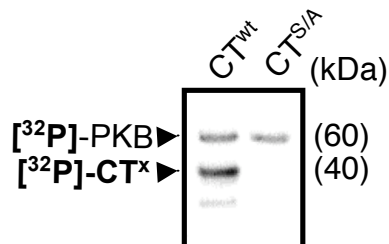**D**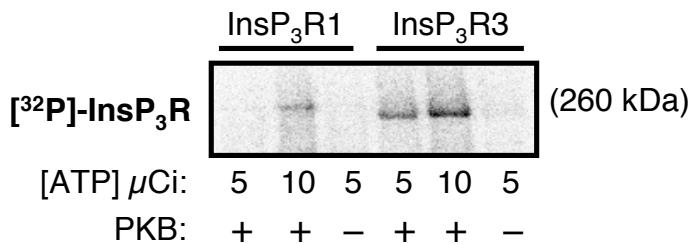

Supplement: supp_0711324105_11324Fig10.pdf [file supp_0711324105_11324Fig10.pdf]

**Ai**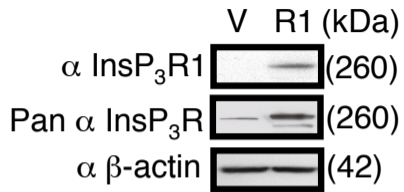**Aii**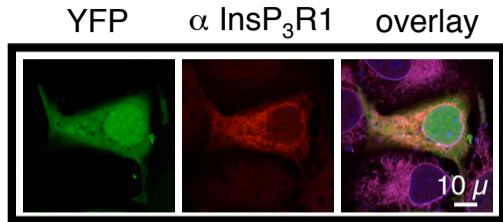**Bi**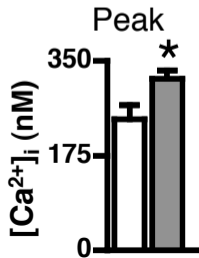**Bii**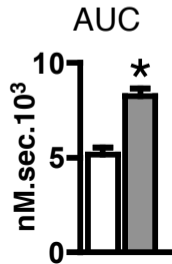**Biii**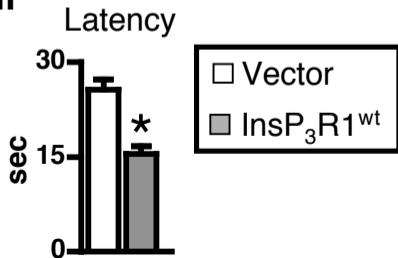

Supplement: supp_0711324105_11324Fig11.pdf [file supp_0711324105_11324Fig11.pdf]

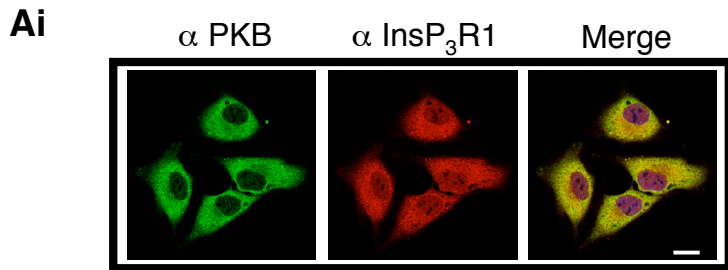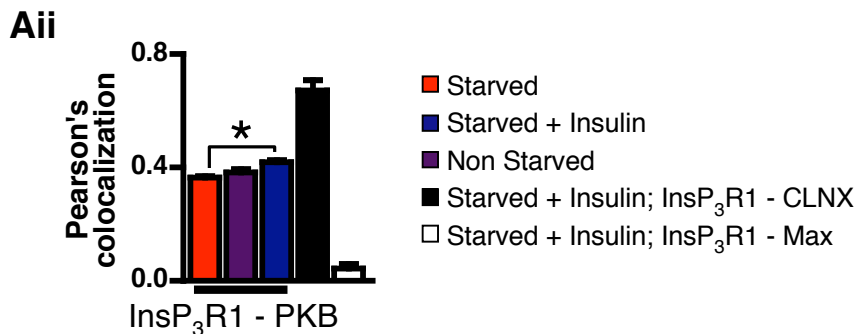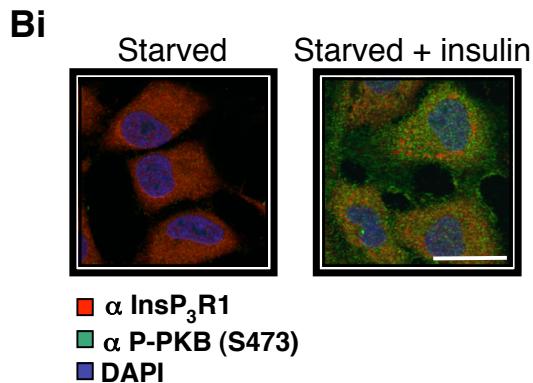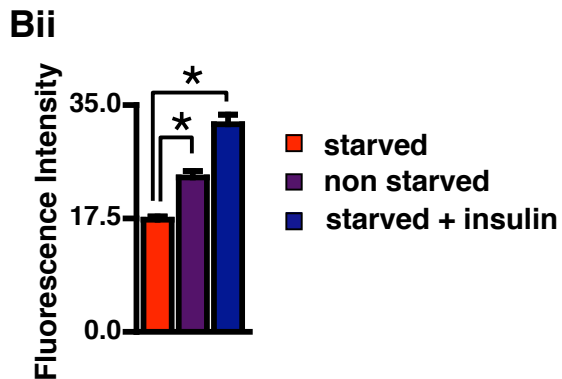

Supplement: supp_0711324105_11324Fig12.pdf [file supp_0711324105_11324Fig12.pdf]

**A**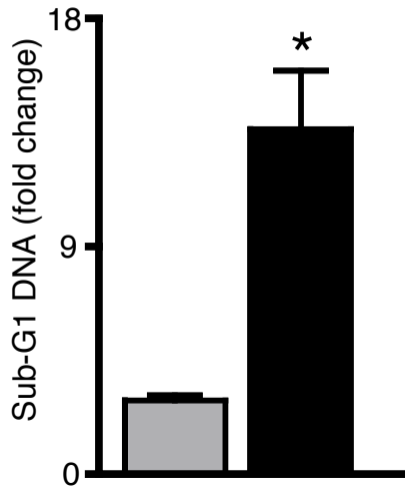**B**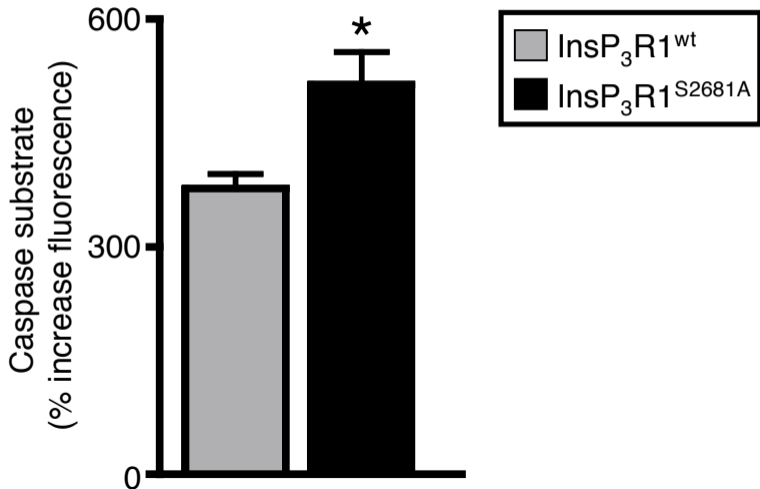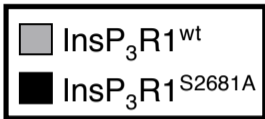

Supplement: supp_0711324105_11324Fig13.pdf [file supp_0711324105_11324Fig13.pdf]

**A**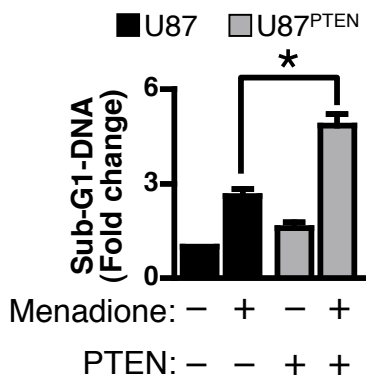**Bi**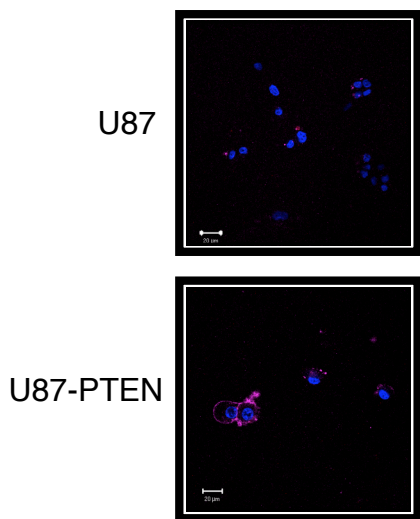**Bii**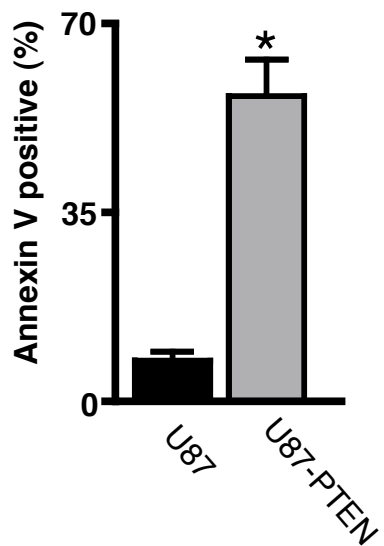

Supplement: supp_0711324105_11324Fig14.pdf [file supp_0711324105_11324Fig14.pdf]

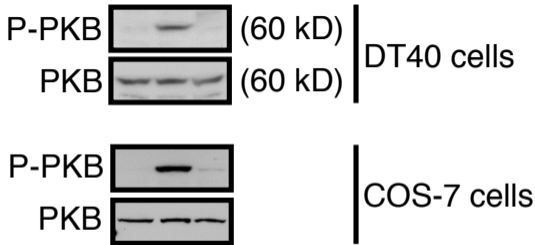

starved: + + -

insulin: - + -

Supplement: supp_0711324105_11324Fig15.pdf [file supp_0711324105_11324Fig15.pdf]

**Ai**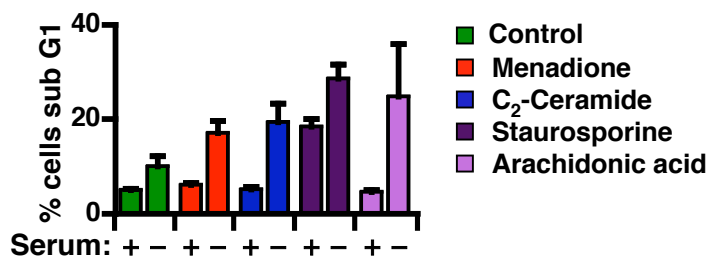**Aii**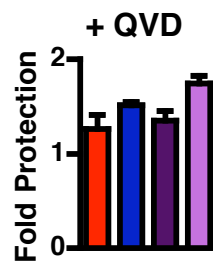**Aiii**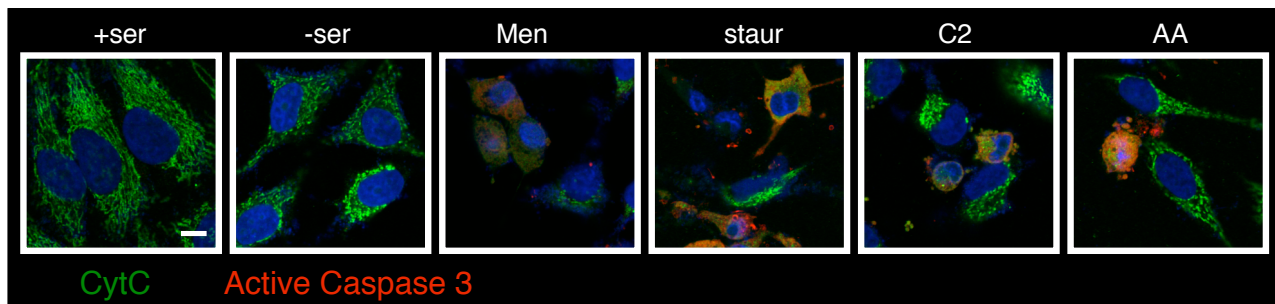**Bi**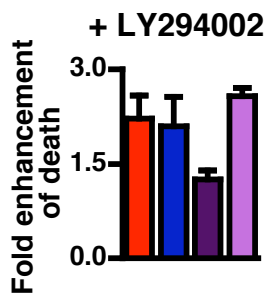**Bii**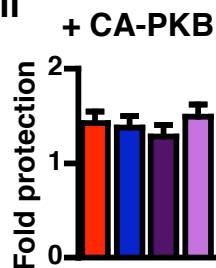**Bi**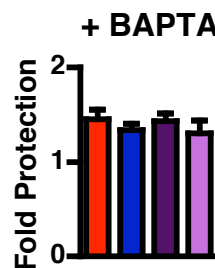**Cii**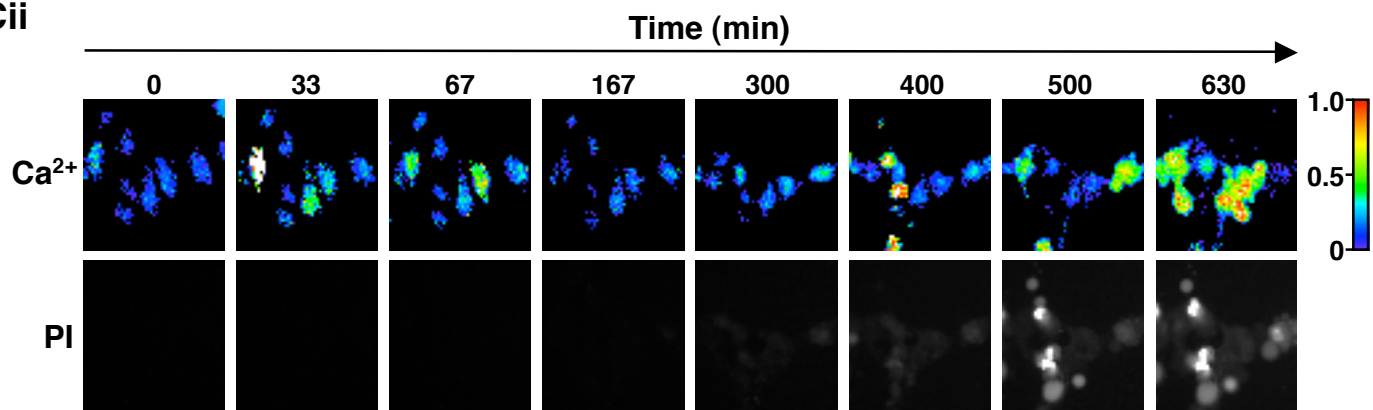**Ciii**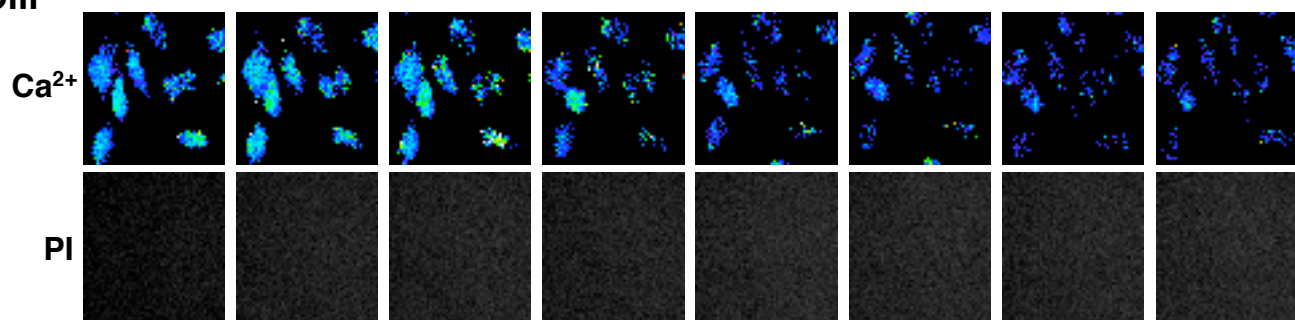

Supplement: supp_0711324105_11324Fig7.pdf [file supp_0711324105_11324Fig7.pdf]

**Ai**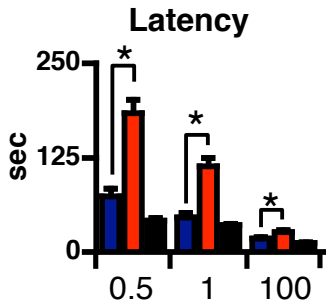**Aii**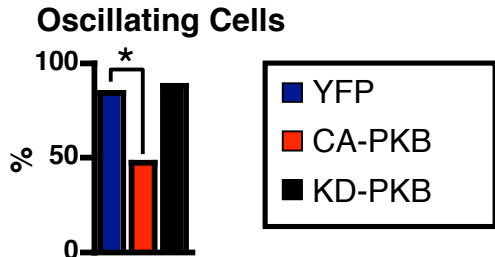**Bi**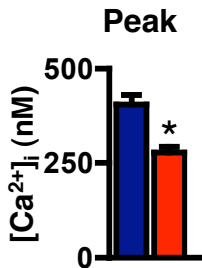**Bii**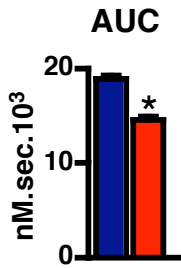

Supplement: supp_0711324105_11324Fig9.pdf [file supp_0711324105_11324Fig9.pdf]
